# Supplementary material
Source: Springer Nature journal article supplement (https://www.springermedizin.de/resource/supplementary/13024_2013_408_MOESM4_ESM.pdf/9644068)

**A**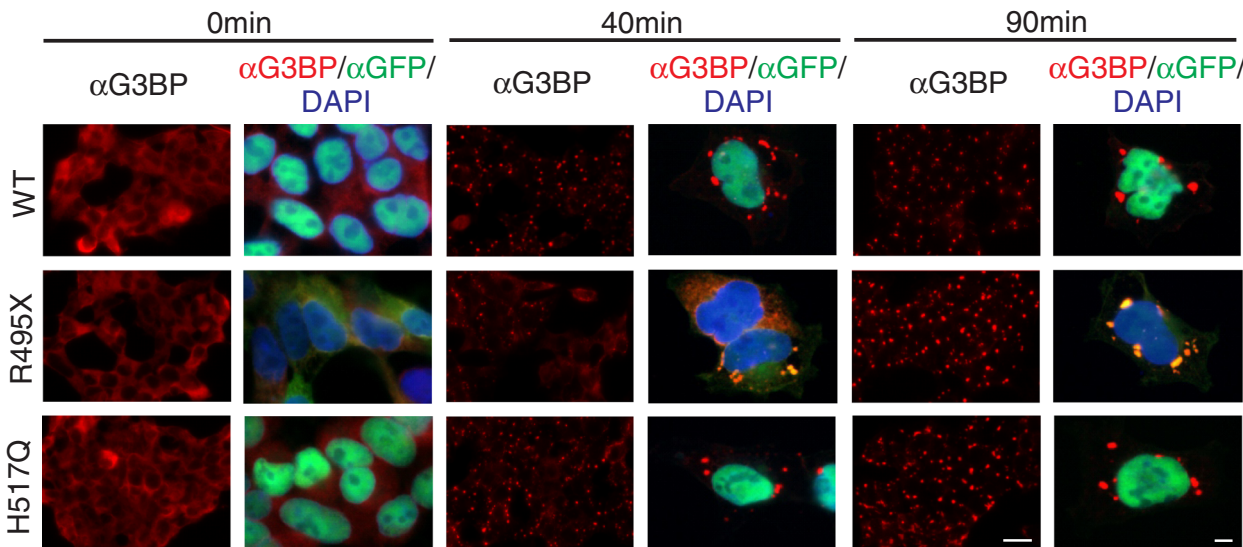**B**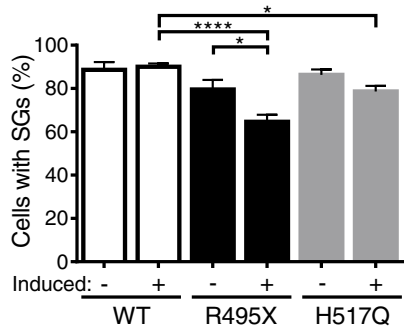**C**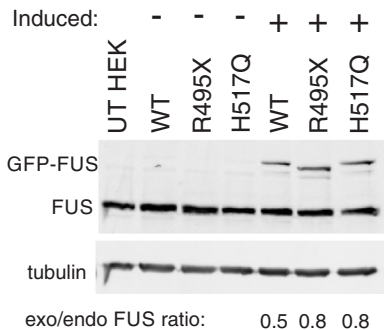**D**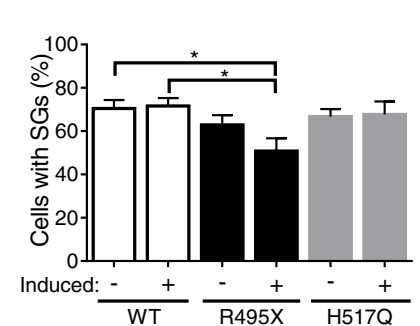

Supplement: MOESM4 [file 9644068]
